# Supplementary material
Source: Royal Society of Chemistry journal article supplement (doi:10.1039/d6sd00020g)
Supplement: d6sd00020g1.pdf [file d6sd00020g1.pdf]

## A Novel Label-Free EC Aptasensor for Early Detection of H9N2 Influenza Using FFT-square wave voltammetry and Validated by Molecular Docking

Negar Heidari<sup>1,2</sup>, Nogol D. Moghaddam<sup>2</sup>, Sharmin Kharrazi<sup>3</sup>, Jahan B. Ghasemi<sup>2</sup>, Melika F. Aghdam<sup>2</sup>, Mahdi Amrollahi Bioyki<sup>1</sup>, Ebrahim Ghafar-Zadeh<sup>1\*</sup>, and Parviz Norouzi<sup>1,2\*</sup>

<sup>1</sup> Dept. of Electrical Engineering and Computer Science, Lassonde School of Engineering, York University, Toronto, Canada

<sup>2</sup> School of Chemistry, University College of Science, University of Tehran, P.O. Box 14155-6455, Tehran, Iran

<sup>3</sup> Department of Medical Nanotechnology, School of Advanced Technologies in Medicine, Tehran University of Medical Sciences, Tehran, Iran

Corresponding Author: Parviz Norouzi, Email: [pnorouzi@yorku.ca](mailto:pnorouzi@yorku.ca)

### 1. SI-1. Measurement Methodology in FFT Voltammetry (FFTSWV)

Square-wave voltammetry (SWV) is a highly sensitive electroanalytical technique in which a square-wave potential is superimposed on a staircase or linear potential ramp to probe electrochemical systems. In the present work, a modified frequency-domain implementation of SWV was employed to enhance signal discrimination and analytical sensitivity. The applied potential waveform, illustrated in Fig. S1A, consists of a small-amplitude square wave superimposed on a linear potential ramp and is described by Eq. S1:

$$E_{SW}(t) = \Delta E(\omega t) + vt \quad (\text{Eq. S1})$$

where  $\Delta E$  is the square-wave amplitude,  $\omega$  is the angular frequency of the applied waveform ( $\omega = 2\pi f$ ), and  $v$  is the linear potential scan rate[1].

The resulting electrode current response contains multiple harmonic components arising from the nonlinear characteristics of the electrochemical interface and can be expressed as a Fourier series:

$$I_{ac}(t) = \Delta I_1 \cos(\omega t + \phi_1) + \Delta I_2 \cos(2\omega t + \phi_2) + \Delta I_3 \cos(3\omega t + \phi_3) + \dots \quad (\text{Eq. S2})$$

where  $\Delta I$  represents the amplitude of the square-wave current,  $\phi$  denotes the phase shift relative to the applied potential, and the subscripts correspond to the harmonic order of the electrode response[2].

Although the harmonic frequencies in Eq. S2 originate from nonlinear electrochemical processes, the experimental conditions adopted in this study maintain the electrode–solution interface in a

quasi-linear regime. This allows reliable harmonic decomposition while minimizing distortion of the fundamental electrochemical response. The first term in Eq. S2 represents the fundamental component of the current, oscillating at the same frequency as the applied square-wave potential and containing the primary Faradaic information of the system.

As shown in Fig. S1B, FFT-SWV employs a more comprehensive data acquisition strategy than conventional SWV. Instead of sampling the current at only two points per square-wave cycle, the current is sampled eight times during each cycle ( $t_0$ – $t_7$ ). These samples are processed using a discrete Fast Fourier Transform (FFT), where the number of sampled points must be a power of 2 ( $2^n$ ) to satisfy FFT computational requirements.

Accordingly, the sampled currents ( $I_{ns}$ ) are acquired at uniform time intervals defined as:

$$t_s, t_s + \frac{1}{8f_0}, t_s + \frac{2}{8f_0}, \dots, t_s + \frac{7}{8f_0}$$

where  $f_0$  is the fundamental square-wave frequency. For each potential increment ( $\Delta E$ ) in the ramp,  $N_c$  square-wave cycles are applied, yielding a total of  $8N_c$  current samples ( $I_0$ – $I_7$  for each cycle). Thus, the complete time-domain dataset for each  $\Delta E$  consists of  $N_c \times 8$  current values.

These data are transformed into the frequency domain using discrete FFT calculation, generating a complex series of frequency components ( $f_n$ ) that represent the fundamental and higher harmonic contributions of the electrode response. At the end of each potential step, the FFT-processed data are stored in an array matrix as:

$$\text{Data array} = \begin{pmatrix} I_0^1 & \dots & I_3^1 \\ \vdots & & \vdots \\ I_0^{N_c t} & \dots & I_3^{N_c t} \end{pmatrix} \quad (\text{Eq. S3})$$

Subsequent digital filtering and signal reconstruction yield the time-domain current according to [3]:

$$I_t = \sum_{n=0}^{N-1} [F_n \cos\left(\frac{2\pi t}{N}\right) + jF_n \sin\left(\frac{2\pi t}{N}\right)] \quad (\text{Eq. S4})$$

where  $N$  represents the total number of current data points collected during the experiment. By transforming the electrochemical response into the frequency domain, FFT-SWV enables selective isolation of Faradaic signal components while effectively suppressing capacitive background currents and low-frequency noise. Compared to conventional time-domain SWV, this approach significantly improves the signal-to-noise ratio, enhances measurement resolution, and increases analytical sensitivity—particularly in complex matrices where baseline drift and non-specific contributions can obscure the true electrochemical response[4].

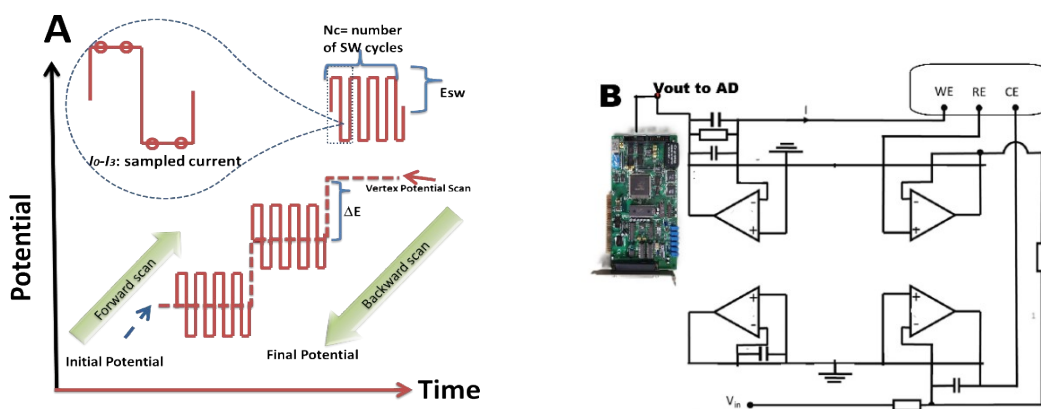

**Figure S1.** A) Schematic diagram illustrates the applied potential waveform, square wave potentials superimposition each step of the potential ramp. SW potential cycle/ the currents were sampled 4 times, **B)** Schematic of the Potentiostat Circuit diagram for FFTSWV measurements.

The FFT-SWV signals recorded in phosphate-buffered saline (PBS) in the presence of the analyte are shown in Fig. S2. All FFT-SWV voltammograms were subjected to consistent digital processing steps, including FFT-based smoothing and background correction, ensuring reliable comparison across measurements. Overall, this frequency-domain SWV framework provides a robust and information-rich methodology for electrochemical biosensing, offering clear advantages over conventional voltammetric techniques in terms of sensitivity, noise suppression, and interpretability of interfacial electrochemical behavior

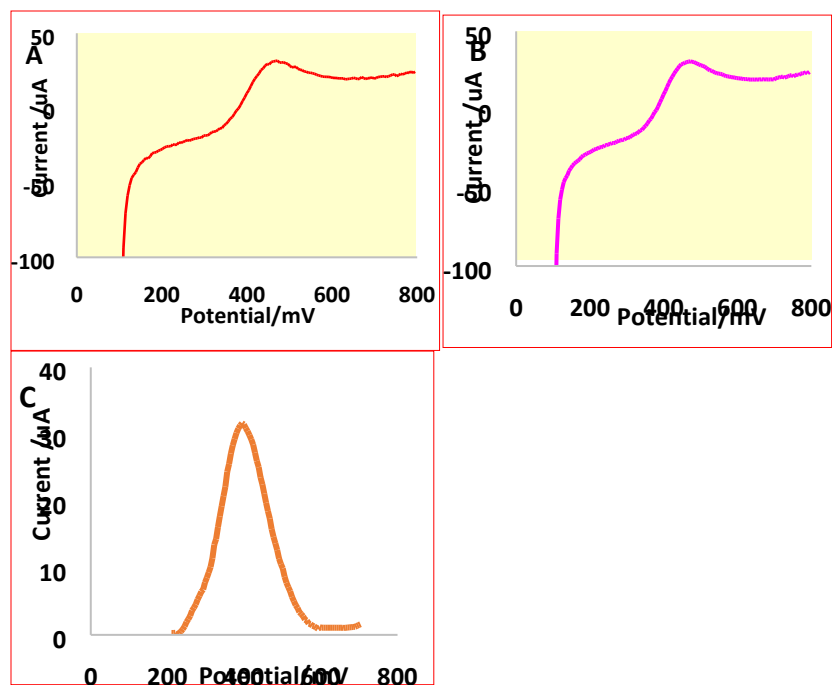

**Figure S2.** The FFT differential admittance voltammograms for the optimization of frequency and amplitude for FFTSWV in solution of PBS pH 7.5, at frequency of 177 Hz, and amplitude range of 20 mV, \number of cycles SW set to 127, and a potential range of 100 to 700 mV. The voltammograms A (original), B) FFT smoothing, C) background correction.

## SI-2. Electron microscopy and EDX Analysis and maps

Field-emission scanning electron microscopy (FE-SEM) combined with energy-dispersive X-ray spectroscopy (EDS) was employed to investigate the morphology, elemental composition, and spatial distribution of materials at each intermediate stage of electrode modification prior to AuNP deposition. For each electrode configuration, the EDS spectrum with the associated quantitative elemental percentages is first discussed, followed by the corresponding elemental mapping results presented within the same figure. For the pristine gold electrode, the EDS spectrum (Fig. S3A) shows a dominant Au signal exceeding 99 wt%, confirming the high purity of the metallic substrate and the absence of detectable impurities. The corresponding elemental map (Fig. S3B) reveals a uniform gold distribution across the entire electrode surface, indicating a homogeneous and continuous Au layer without compositional heterogeneity.

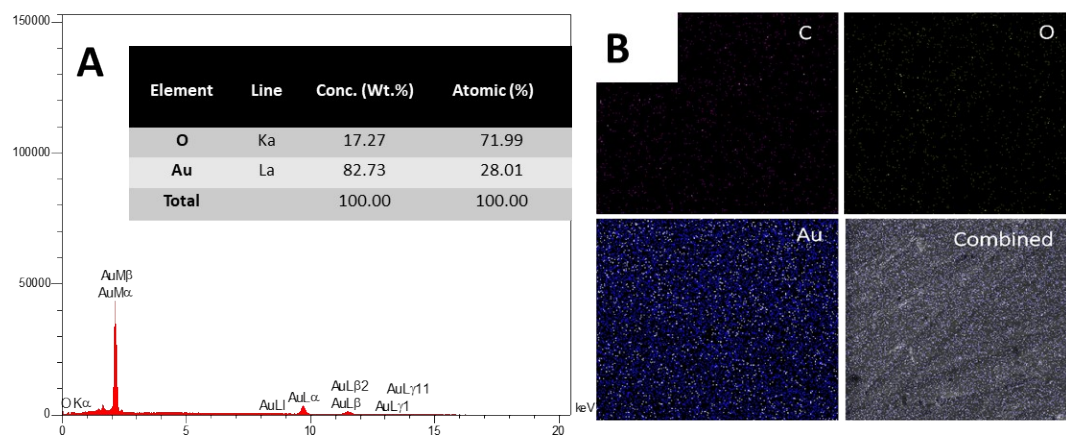

Fig. S3. EDX Analysis and maps of AuE.

After graphene oxide deposition, the EDS spectrum (Fig. S4A) reveals the emergence of carbon and oxygen as the predominant elements, while the Au signal is substantially attenuated, confirming effective surface coverage by GO sheets. The quantitative composition extracted from the EDS spectrum indicates that carbon and oxygen together account for the majority of the detected elements, consistent with oxygen-rich graphene oxide. The accompanying elemental maps (Fig. S4B) show a homogeneous spatial distribution of both carbon and oxygen over the electrode surface, confirming continuous GO film formation without exposed gold regions.

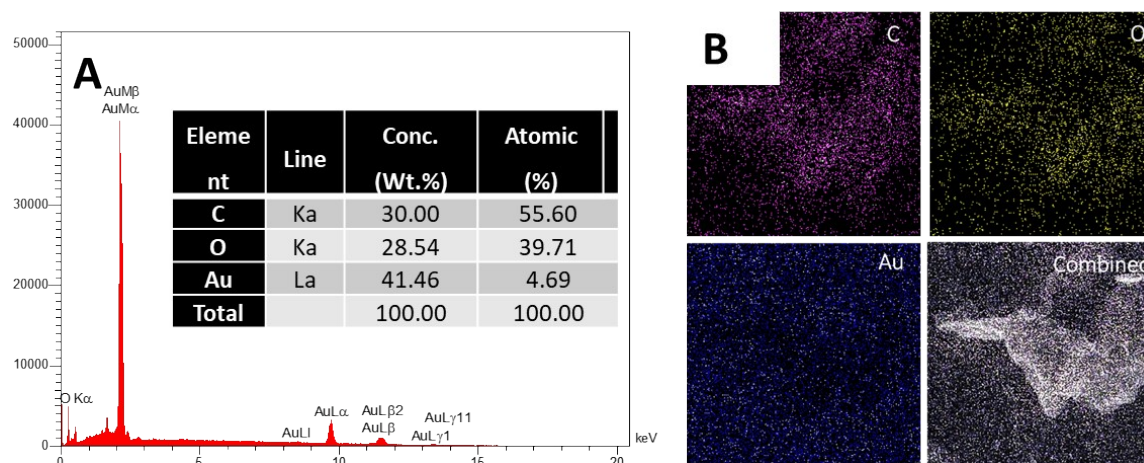

Fig. S4. EDX Analysis and maps of AuE/GO.

Upon incorporation of cerium oxide nanoparticles, the EDS spectrum (Fig. S5A) displays distinct cerium peaks together with an increased oxygen contribution, reflecting the presence of CeO<sub>2</sub> in addition to GO oxygen functionalities. Quantitative analysis extracted directly from the EDS spectrum indicates a measurable cerium content with low variation across analyzed regions. The corresponding elemental maps (Fig. S5B) demonstrate strong spatial co-localization of Ce, O, and C signals throughout the electrode surface, confirming uniform dispersion of CeO<sub>2</sub> nanoparticles within the GO matrix rather than localized aggregation. The low relative deviation (<7%) in cerium and oxygen content across mapped areas further indicates good compositional uniformity. This intercalated CeO<sub>2</sub>–GO architecture is consistent with previous reports showing that cerium oxide nanoparticles embedded within graphene-based matrices suppress sheet restacking, introduce oxygen-vacancy-rich interfaces, and enhance interfacial stability and charge-transfer pathways.

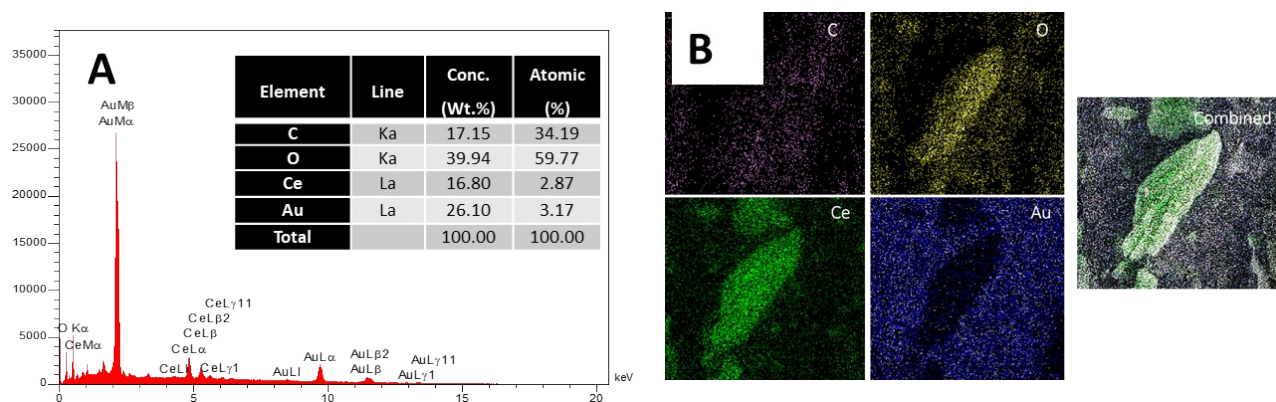

Fig. S5. EDX Analysis and maps of AuE/nanoCeO<sub>2</sub>-GO.

Overall, the combined FE-SEM morphology, EDS-derived quantitative compositions, and elemental mapping analyses presented in Figs. S3–S5 confirm the controlled and reproducible fabrication of the AuE, AuE/GO, and AuE/nanoCeO<sub>2</sub>-GO electrodes, providing a structurally and compositionally validated foundation for the final AuNP-modified sensing interface discussed in the main text.

### SI-3. EC characterization of the aptasensor

The stepwise modification of the electrode was confirmed by cyclic voltammetry, showing successive changes in redox current and peak separation consistent with surface functionalization,

figure S6. In particular, nanocomposite formation enhanced electron transfer, while aptamer immobilization and subsequent virus binding led to progressive current suppression due to electrostatic effects, surface blocking, and steric hindrance of the redox probe.

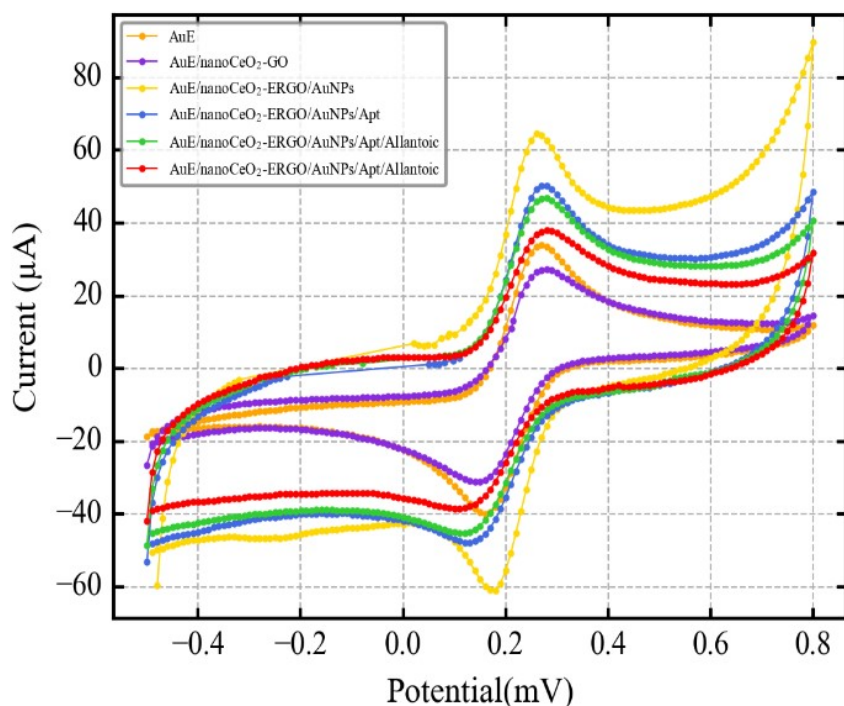

**Figure S6.** CVs of (a) bare Au (b) Au/nanoCeO<sub>2</sub>-GO (c) Au/nanoCeO<sub>2</sub>-rGO/AuNPs (d) Au/nanoCeO<sub>2</sub>-rGO/AuNPs/Apt (e) Au/nanoCeO<sub>2</sub>-rGO/AuNPs/ Apt/Allantoic (f) Au/nanoCeO<sub>2</sub>-rGO/AuNPs/Apt/Allantoic/H9N2 in 0.1 M PBS solution, pH 7.5 containing 5 mmol L<sup>-1</sup> [Fe(CN)<sub>6</sub>]<sup>3-/4-</sup> and 250 mmol L<sup>-1</sup> KCl,

#### SI-4. Optimization of EC parameters

In FFT-SWV measurements, the square-wave frequency, amplitude, and number of cycles collectively define the effective potential sweep rate experienced by the electrochemical system, in close analogy to scan-rate control in cyclic voltammetry. Consequently, optimization of these parameters is essential to balance Faradaic charge transfer against kinetic and capacitive limitations at the electrode–electrolyte interface. As shown in Fig. S7, increasing the square-wave frequency from 88 to 177 Hz enhances the electrochemical response, reflecting an increase in the

effective sweep rate that remains compatible with the fast and reversible redox kinetics of the  $[\text{Fe}(\text{CN})_6]^{3-/4-}$  couple at the modified electrode surface[49, 50]. Within this regime, electron transfer and ion transport can adequately follow the applied potential modulation, leading to enhanced Faradaic current. At higher frequencies, however, the effective sweep rate becomes excessive, analogous to operating cyclic voltammetry at overly high scan rates. Under these conditions, the characteristic time scale of the excitation approaches or exceeds the intrinsic charge-transfer and mass-transport time constants, resulting in incomplete redox conversion, increased capacitive contributions, and distortion of the FFT-SWV response[37]. This kinetic mismatch leads to a progressive attenuation of the Faradaic signal and reduced analytical performance. A similar trade-off is observed for the square-wave amplitude. Increasing the amplitude up to 20 mV improves sensitivity by increasing the driving force for electron transfer, whereas larger amplitudes introduce non-ideal electrochemical behavior, including elevated capacitive currents and degradation of the signal-to-noise ratio. The influence of the number of square-wave cycles ( $N_{\text{sw}}$ ) on the FFT-SWV response is shown in Fig. 6B. Increasing  $N_{\text{sw}}$  from 16 to 120 cycles leads to a progressive enhancement of the Faradaic signal, attributed to improved signal averaging while maintaining a sufficiently high effective sweep rate. In this regime, charge-transfer kinetics remain favorable and the cumulative Faradaic contribution increases. At higher  $N_{\text{sw}}$  values (256 cycles), the response decreases markedly. This behavior arises from a reduction in the effective sweep rate (Eq. S1), analogous to excessively slow scan rates in cyclic voltammetry, where diffusion and capacitive contributions dominate and attenuate the Faradaic signal. Based on the combined optimization of frequency, amplitude, and cycle number, 177 Hz, 20 mV, and  $N_{\text{sw}} = 120$  were selected as the optimal FFT-SWV conditions for subsequent measurements.

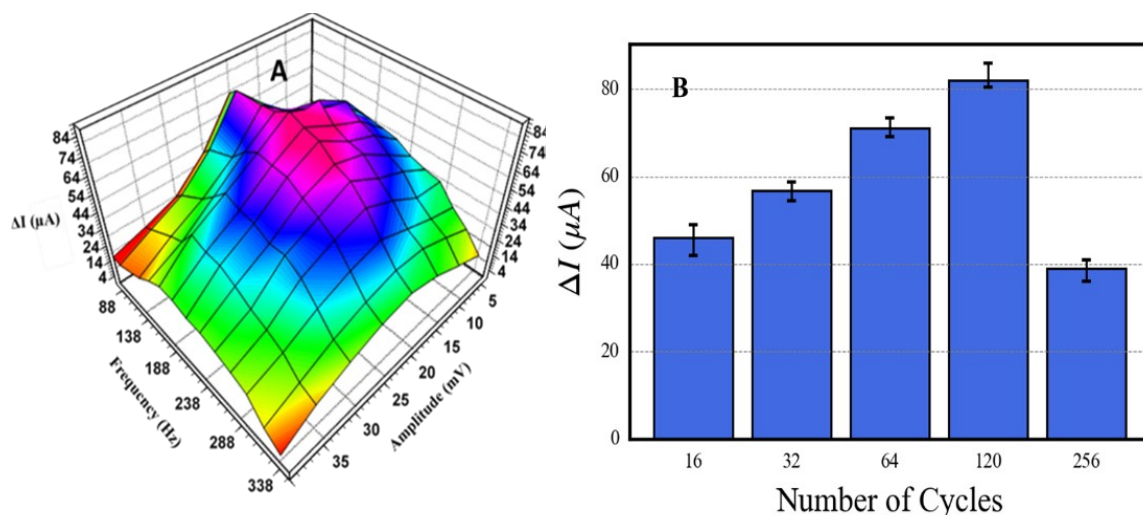

**Figure S7.** (A) The effect of the Frequency/amplitude and (B) cycles number on the electrode response after incubating in PBS pH 7.5, using FFTAV on the FFT-SWV response of the aptasensor. FFTSWV measurements were performed in 0.1 M KCl electrolyte PBS solution, pH 7.5 containing 5mM  $[\text{Fe}(\text{CN})_6]^{3-}$  redox, and presence of  $1.0 \times 10^3$  PFU  $\text{mL}^{-1}$  of H9N2.

### SI-5. Molecular docking

Supplementary Table S2 lists the hydrogen-bond interactions identified in the docked B4–protein complex, including interacting aptamer nucleotides, protein residues, and hydrogen-bond distances calculated from the docking simulations.

Table S-1. Detailed protein–aptamer interaction pairs for four representative aptamers (B4, A6, A21, and B25), showing receptor residue, ligand residue, and their interaction distance (in Å). Interactions within hydrogen bond distance (2.0–3.5 Å) are bolded to highlight specific hydrogen bonding events.

| B4            |       |       | A6     |       |       | A21    |       |       | B25    |       |       |
|---------------|-------|-------|--------|-------|-------|--------|-------|-------|--------|-------|-------|
| RECEP         | LIGAN | DISTA | RECEP  | LIGAN | DISTA | RECEP  | LIGAN | DISTA | RECEP  | LIGAN | DISTA |
| TOR           | D     | NCE   | TOR    | D     | NCE   | TOR    | D     | NCE   | TOR    | D     | NCE   |
| RESIDU        | RESID |       | RESIDU | RESID |       | RESIDU | RESID |       | RESIDU | RESID |       |
| E             | UE    |       | E      | UE    |       | E      | UE    |       | E      | UE    |       |
| <b>GLU31A</b> | DG26  | 3.801 | LEU19A | DG22  | 4.538 | LEU19A | DC22  | 3.971 | LYS260 | DG26  | 4.689 |

|                           |                         |              |                           |             |              |                           |             |              |                           |                         |              |
|---------------------------|-------------------------|--------------|---------------------------|-------------|--------------|---------------------------|-------------|--------------|---------------------------|-------------------------|--------------|
|                           | S                       |              |                           | S           |              |                           | S           |              | A                         | S                       |              |
| <b>LEU33A</b>             | DG26<br>S               | 4.897        | GLU100<br>A               | DT9S        | 3.597        | GLU100<br>A               | DG8S        | 4.692        | GLU275<br>A               | DC24<br>S               | 4.053        |
| <b>HIS34A</b>             | <b>DG27</b><br><b>S</b> | <b>2.693</b> | GLU100<br>A               | DT10S       | 4.77         | <b>GLU100</b><br><b>A</b> | <b>DG9S</b> | <b>2.424</b> | GLU275<br>A               | DG25<br>S               | 4.031        |
| <b>HIS34A</b>             | DC28<br>S               | 4.7          | SER103<br>A               | DT9S        | 3.957        | SER103<br>A               | DG8S        | 4.986        | ARG276<br>A               | DC24<br>S               | 4.142        |
| <b>SER36A</b>             | DG26<br>S               | 4.189        | <b>LEU104</b><br><b>A</b> | <b>DC8S</b> | <b>3.447</b> | SER103<br>A               | DG9S        | 3.903        | ASN287<br>A               | DT23S                   | 3.964        |
| <b>SER36A</b>             | DG27<br>S               | 4.954        | SER107<br>A               | DT9S        | 4.609        | LEU104<br>A               | DG8S        | 3.89         | ASN287<br>A               | DC24<br>S               | 4.739        |
| <b>HIS37A</b>             | DT21S                   | 3.844        | <b>GLU197</b><br><b>A</b> | <b>DG4S</b> | <b>2.927</b> | SER107<br>A               | DG9S        | 4.868        | VAL288<br>A               | DC24<br>S               | 4.064        |
| <b>GLN271</b><br><b>A</b> | DG29<br>S               | 3.83         | GLU197<br>A               | DG5S        | 3.988        | GLU197<br>A               | DT4S        | 4.941        | SER289<br>A               | DC24<br>S               | 3.896        |
| <b>ARG276</b><br><b>A</b> | DG19<br>S               | 4.666        | ASP198<br>A               | DG4S        | 3.947        | <b>GLU197</b><br><b>A</b> | <b>DG5S</b> | <b>3.174</b> | <b>LYS290</b><br><b>A</b> | <b>DC24</b><br><b>S</b> | <b>3.446</b> |
| <b>ARG276</b><br><b>A</b> | <b>DG20</b><br><b>S</b> | <b>2.573</b> | ASP198<br>A               | DG5S        | 3.681        | ASP198<br>A               | DT4S        | 3.921        | <b>LYS290</b><br><b>A</b> | <b>DG25</b><br><b>S</b> | <b>3.169</b> |
| <b>ARG276</b><br><b>A</b> | <b>DT21S</b>            | <b>2.546</b> | <b>ASP198</b><br><b>A</b> | <b>DG6S</b> | <b>2.259</b> | <b>ASP198</b><br><b>A</b> | <b>DG5S</b> | <b>2.396</b> | TYR291<br>A               | DC24<br>S               | 4.32         |
| <b>ASN280</b><br><b>A</b> | DG27<br>S               | 4.909        | ILE199A                   | DG3S        | 4.994        | <b>ASP198</b><br><b>A</b> | <b>DC6S</b> | <b>2.966</b> | <b>TYR291</b><br><b>A</b> | <b>DG25</b><br><b>S</b> | <b>2.113</b> |
| <b>ASN280</b><br><b>A</b> | <b>DC28</b><br><b>S</b> | <b>3.161</b> | ILE199A                   | DG4S        | 4.251        | ILE199A                   | DG5S        | 4.89         | TYR291<br>A               | DG26<br>S               | 4.065        |
| <b>ASN280</b><br><b>A</b> | <b>DG29</b><br><b>S</b> | <b>2.366</b> | ILE199A                   | DG5S        | 4.763        | ASN200<br>A               | DT1S        | 1.914        | TYR299<br>A               | DT23S                   | 1.706        |
| <b>ASN280</b><br><b>A</b> | DC30<br>S               | 3.919        | ASN200<br>A               | DC1S        | 1.818        | <b>ASN200</b><br><b>A</b> | <b>DC2S</b> | <b>3.395</b> | TYR299<br>A               | DC24<br>S               | 3.739        |
| <b>THR281</b><br><b>A</b> | DG27<br>S               | 3.571        | <b>ASN200</b><br><b>A</b> | <b>DG2S</b> | <b>3.273</b> | ASN200<br>A               | DA3S        | 4.766        | VAL300<br>A               | DT23S                   | 4.978        |
| <b>THR281</b><br><b>A</b> | <b>DC28</b><br><b>S</b> | <b>3.245</b> | ASN200<br>A               | DG3S        | 4.633        | ARG201<br>A               | DT1S        | 4.464        | <b>GLY301</b><br><b>A</b> | <b>DT22S</b>            | <b>2.151</b> |
| <b>THR281</b><br><b>A</b> | DG29<br>S               | 4.368        | ARG201<br>A               | DC1S        | 4.732        | <b>THR202</b><br><b>A</b> | <b>DT1S</b> | <b>2.669</b> | <b>GLY301</b><br><b>A</b> | <b>DT23S</b>            | <b>2.57</b>  |

|                     |                   |              |                     |                   |              |                     |                   |              |                     |                   |              |
|---------------------|-------------------|--------------|---------------------|-------------------|--------------|---------------------|-------------------|--------------|---------------------|-------------------|--------------|
| <b>THR282<br/>A</b> | DG27<br>S         | 4.948        | <b>THR202<br/>A</b> | <b>DC1S</b>       | <b>3.407</b> | <b>LYS228<br/>A</b> | <b>DG5S</b>       | <b>3.495</b> | VAL302<br>A         | DA21S             | 4.149        |
| <b>THR282<br/>A</b> | <b>DC28<br/>S</b> | <b>2.903</b> | VAL226<br>A         | DG6S              | 4.666        | <b>LYS228<br/>A</b> | <b>DC6S</b>       | <b>2.998</b> | <b>VAL302<br/>A</b> | <b>DT22S</b>      | <b>3.294</b> |
| <b>THR282<br/>A</b> | <b>DG29<br/>S</b> | <b>3.483</b> | LYS228<br>A         | DG5S              | 3.632        | LYS228<br>A         | DC7S              | 4.404        | VAL302<br>A         | DT23S             | 4.409        |
| <b>LEU283<br/>A</b> | DG26<br>S         | 4.627        | LYS228<br>A         | DG6S              | 3.945        | GLN231<br>A         | DG5S              | 4.433        | LYS303<br>A         | DT22S             | 4.345        |
| <b>LEU283<br/>A</b> | DG27<br>S         | 3.697        | LYS228<br>A         | DT7S              | 4.163        | GLU253<br>A         | DG9S              | 4.563        | <b>LYS303<br/>A</b> | <b>DT23S</b>      | <b>3.486</b> |
| <b>ASN287<br/>A</b> | DG19<br>S         | 4.575        | GLN231<br>A         | DG5S              | 4.364        | PHE3B               | DC29<br>S         | 4.265        | LYS51B              | GG13<br>S         | 4.6          |
| <b>ASN287<br/>A</b> | DG20<br>S         | 4.689        | GLU253<br>A         | DT9S              | 4.089        | PHE3B               | DC30<br>S         | 4.423        | ASN54B              | GG13<br>S         | 4.791        |
| <b>VAL288<br/>A</b> | DG20<br>S         | 3.576        | PHE3B               | DC29<br>S         | 4.004        | LYS58B              | DA18S             | 4.922        | ASN54B              | GG14<br>S         | 3.894        |
| <b>TYR299<br/>A</b> | <b>DG19<br/>S</b> | <b>3.313</b> | PHE3B               | DC30<br>S         | 4.144        | <b>LYS58B</b>       | <b>DT19S</b>      | <b>3.049</b> | ILE55B              | GG14<br>S         | 4.167        |
| <b>GLY301<br/>A</b> | <b>DG18<br/>S</b> | <b>3.044</b> | LYS58B              | DG19<br>S         | 3.873        | <b>MET59B</b>       | <b>DT19S</b>      | <b>2.788</b> | LYS58B              | GG13<br>S         | 4.821        |
| <b>GLY301<br/>A</b> | <b>DG19<br/>S</b> | <b>3.348</b> | LYS58B              | DG20<br>S         | 4.564        | <b>MET59B</b>       | <b>DC20<br/>S</b> | <b>3.533</b> | <b>LYS58B</b>       | <b>GG14<br/>S</b> | <b>2.65</b>  |
| <b>VAL302<br/>A</b> | DG18<br>S         | 4.008        | <b>MET59B</b>       | <b>DG19<br/>S</b> | <b>3.395</b> | HIS68B              | DG9S              | 4.215        | <b>LYS58B</b>       | <b>GC15<br/>S</b> | <b>3.053</b> |
| <b>VAL302<br/>A</b> | DG19<br>S         | 4.704        | MET59B              | DG20<br>S         | 3.645        | <b>HIS68B</b>       | <b>DT10S</b>      | <b>2.844</b> | MET59B              | GC15<br>S         | 4.542        |
| <b>LYS303<br/>A</b> | DG18<br>S         | 3.896        | HIS68B              | DT9S              | 4.395        | PHE70B              | DT10S             | 4.263        | ASP67B              | DG25<br>S         | 4.899        |
| <b>LYS303<br/>A</b> | <b>DG19<br/>S</b> | <b>3.305</b> | HIS68B              | DT10S             | 3.946        | <b>LEU77B</b>       | <b>DT10S</b>      | <b>2.946</b> | ASP67B              | DG26<br>S         | 4.04         |
| <b>NAG1D</b>        | <b>DG29<br/>S</b> | <b>2.48</b>  | PHE70B              | DT10S             | 4.585        | LEU77B              | DT11S             | 3.7          | GLU72B              | DT27S             | 4.958        |
| <b>NAG1D</b>        | DC30<br>S         | 1.743        | <b>LEU77B</b>       | <b>DT10S</b>      | <b>3.278</b> | ILE80B              | DT11S             | 4.209        | GLU72B              | DT28S             | 4.39         |
| <b>NAG1D</b>        | DC31              | 3.993        | LEU77B              | DG11              | 3.925        | <b>ASN81B</b>       | <b>DT10S</b>      | <b>3.458</b> | THR75B              | DT27S             | 4.154        |

|              |                         |              |                           |                         |              |                           |                         |              |               |                         |              |
|--------------|-------------------------|--------------|---------------------------|-------------------------|--------------|---------------------------|-------------------------|--------------|---------------|-------------------------|--------------|
|              | S                       |              |                           | S                       |              |                           |                         |              |               |                         |              |
| <b>NAG2D</b> | <b>DC30</b><br><b>S</b> | <b>2.942</b> | ILE80B                    | DG11<br>S               | 4.61         | <b>ASN81B</b>             | <b>DT11S</b>            | <b>3.135</b> | ASN78B        | DG26<br>S               | 4.622        |
| <b>NAG2D</b> | DC31<br>S               | 3.648        | ASN81B                    | DT10S                   | 4.305        | <b>ILE84B</b>             | <b>DT11S</b>            | <b>2.67</b>  | MET79B        | DG26<br>S               | 4.51         |
| <b>NAG1E</b> | DG18<br>S               | 4.696        | ASN81B                    | DG11<br>S               | 3.817        | ILE84B                    | DT12S                   | 4.629        | <b>ASN82B</b> | <b>DG25</b><br><b>S</b> | <b>3.357</b> |
| <b>NAG1E</b> | <b>DG19</b><br><b>S</b> | <b>2.285</b> | ILE84B                    | DG11<br>S               | 4.014        | TRP92B                    | DA18S                   | 4.41         | <b>ASN82B</b> | <b>DG26</b><br><b>S</b> | <b>2.888</b> |
| <b>NAG1E</b> | DG20<br>S               | 1.466        | ILE84B                    | DC12<br>S               | 4.382        | TRP92B                    | DT19S                   | 3.574        | ASP85B        | DG25<br>S               | 4.534        |
| <b>NAG1E</b> | DT21S                   | 4.645        | ILE91B                    | DG19<br>S               | 4.915        | TYR94B                    | DC20<br>S               | 3.64         | ASP86B        | DC24<br>S               | 4.875        |
| <b>NAG1E</b> | DG23<br>S               | 4.751        | TRP92B                    | DG19<br>S               | 3.523        | <b>TYR94B</b>             | <b>DG21</b><br><b>S</b> | <b>2.341</b> | ASP86B        | DG25<br>S               | 3.973        |
| <b>NAG2E</b> | DG20<br>S               | 4.202        | TYR94B                    | DG20<br>S               | 4.616        | ASN95B                    | DT19S                   | 3.728        | GLN87B        | GC19<br>S               | 3.567        |
| <b>NAG2E</b> | <b>DT21S</b>            | <b>2.345</b> | <b>TYR94B</b>             | <b>DC21</b><br><b>S</b> | <b>2.452</b> | ASN95B                    | DC20<br>S               | 4.194        | GLN89B        | DA21S                   | 4.21         |
| <b>NAG2E</b> | DG22<br>S               | 1.988        | ASN95B                    | DG19<br>S               | 3.82         | LEU98B                    | DC20<br>S               | 4.388        | GLN89B        | DT22S                   | 3.517        |
| <b>NAG2E</b> | <b>DG23</b><br><b>S</b> | <b>2.46</b>  | ASN95B                    | DG20<br>S               | 3.897        | LEU98B                    | DG21<br>S               | 3.582        | <b>GLN89B</b> | <b>DT23S</b>            | <b>2.553</b> |
| <b>NAG2E</b> | DG24<br>S               | 4.413        | LEU98B                    | DC21<br>S               | 4.114        | <b>LEU99B</b>             | <b>DC20</b><br><b>S</b> | <b>3.449</b> | GLN89B        | DC24<br>S               | 3.762        |
| <b>NAG2E</b> | DT25S                   | 4.624        | <b>LEU99B</b>             | <b>DG20</b><br><b>S</b> | <b>2.917</b> | LEU99B                    | DG21<br>S               | 3.521        | ASP90B        | GC19<br>S               | 4.056        |
|              |                         |              | LEU99B                    | DC21<br>S               | 3.913        | LEU102<br>B               | DG21<br>S               | 3.887        | <b>ASP90B</b> | <b>GG20</b><br><b>S</b> | <b>2.442</b> |
|              |                         |              | LEU102<br>B               | DC21<br>S               | 3.588        | <b>LEU102</b><br><b>B</b> | <b>DC22</b><br><b>S</b> | <b>3.267</b> | <b>ASP90B</b> | <b>DA21</b><br><b>S</b> | <b>3.279</b> |
|              |                         |              | <b>LEU102</b><br><b>B</b> | <b>DG22</b><br><b>S</b> | <b>2.42</b>  | LYS106<br>B               | DG21<br>S               | 4.078        | <b>ASP90B</b> | <b>DT22S</b>            | <b>3.324</b> |
|              |                         |              | LYS106<br>B               | DC21<br>S               | 3.905        | ASN116<br>B               | DC30<br>S               | 1.925        | ASP90B        | DT23S                   | 4.89         |

|  |  |  |                     |                   |              |                     |                   |              |               |                   |              |
|--|--|--|---------------------|-------------------|--------------|---------------------|-------------------|--------------|---------------|-------------------|--------------|
|  |  |  | ASN116<br>B         | DC30<br>S         | 1.833        | ASN116<br>B         | DC31<br>S         | 3.875        | ILE91B        | GG17<br>S         | 4.534        |
|  |  |  | ASN116<br>B         | DG31<br>S         | 3.597        | ASN117<br>B         | DC29<br>S         | 3.845        | <b>ILE91B</b> | <b>GG18<br/>S</b> | <b>2.862</b> |
|  |  |  | ASN117<br>B         | DC29<br>S         | 4.168        | ASN117<br>B         | DC30<br>S         | 4.101        | ILE91B        | GC19<br>S         | 4.205        |
|  |  |  | ASN117<br>B         | DC30<br>S         | 3.538        | <b>ASN120<br/>B</b> | <b>DC30<br/>S</b> | <b>2.959</b> | ILE91B        | GG20<br>S         | 4.515        |
|  |  |  | <b>ASN120<br/>B</b> | <b>DC30<br/>S</b> | <b>3.104</b> | ASN120<br>B         | DC31<br>S         | 3.913        | TRP92B        | GC15<br>S         | 4.676        |
|  |  |  | ASN120<br>B         | DG31<br>S         | 3.6          | LYS123<br>B         | DC31<br>S         | 4.84         | <b>TRP92B</b> | <b>TT16S</b>      | <b>3.151</b> |
|  |  |  | LYS123<br>B         | DG31<br>S         | 4.944        | <b>ARG124<br/>B</b> | <b>DC30<br/>S</b> | <b>3.018</b> | THR93B        | GG20<br>S         | 4.492        |
|  |  |  | LYS123<br>B         | DA32S             | 4.575        |                     |                   |              | <b>THR93B</b> | <b>DA21<br/>S</b> | <b>2.325</b> |
|  |  |  | <b>ARG124<br/>B</b> | <b>DC30<br/>S</b> | <b>2.989</b> |                     |                   |              | THR93B        | DT22S             | 4.345        |
|  |  |  | ARG124<br>B         | DG31<br>S         | 4.632        |                     |                   |              | TYR94B        | GG17<br>S         | 4.681        |
|  |  |  |                     |                   |              |                     |                   |              | <b>TYR94B</b> | <b>GG18<br/>S</b> | <b>3.127</b> |
|  |  |  |                     |                   |              |                     |                   |              | <b>TYR94B</b> | <b>GC19<br/>S</b> | <b>3.351</b> |
|  |  |  |                     |                   |              |                     |                   |              | <b>TYR94B</b> | <b>GG20<br/>S</b> | <b>3.059</b> |
|  |  |  |                     |                   |              |                     |                   |              | TYR94B        | DA21S             | 4.656        |
|  |  |  |                     |                   |              |                     |                   |              | ASN95B        | TT16S             | 4.964        |
|  |  |  |                     |                   |              |                     |                   |              | ASN95B        | GG17<br>S         | 4.742        |
|  |  |  |                     |                   |              |                     |                   |              | ASN95B        | GG18<br>S         | 4.503        |
|  |  |  |                     |                   |              |                     |                   |              | <b>GLU97B</b> | <b>GG20<br/>S</b> | <b>3.518</b> |
|  |  |  |                     |                   |              |                     |                   |              | <b>GLU97B</b> | <b>DA21</b>       | <b>2.877</b> |

|  |  |  |  |  |  |  |  |  |                     |                   |              |
|--|--|--|--|--|--|--|--|--|---------------------|-------------------|--------------|
|  |  |  |  |  |  |  |  |  |                     | <b>S</b>          |              |
|  |  |  |  |  |  |  |  |  | LEU98B              | GG20<br>S         | 4.508        |
|  |  |  |  |  |  |  |  |  | LEU99B              | GG13<br>S         | 4.668        |
|  |  |  |  |  |  |  |  |  | LEU99B              | GG14<br>S         | 3.731        |
|  |  |  |  |  |  |  |  |  | <b>GLU103<br/>B</b> | <b>TT12S</b>      | <b>3.18</b>  |
|  |  |  |  |  |  |  |  |  | GLU103<br>B         | GG13<br>S         | 0.742        |
|  |  |  |  |  |  |  |  |  | LYS106<br>B         | TT11S             | 4.999        |
|  |  |  |  |  |  |  |  |  | <b>LYS106<br/>B</b> | <b>TT12S</b>      | <b>2.729</b> |
|  |  |  |  |  |  |  |  |  | <b>LYS106<br/>B</b> | <b>GG13<br/>S</b> | <b>2.244</b> |
|  |  |  |  |  |  |  |  |  |                     |                   |              |
|  |  |  |  |  |  |  |  |  |                     |                   |              |

1. Heidari, N., et al., *A novel label-free immunosensor for detection of VEGF using FFT admittance voltammetry*. *Bioelectrochemistry*, 2025. **165**: p. 108948.
2. Ebrahimi, M., et al., *Advancing chirality analysis through enhanced enantiomer characterization and quantification via fast Fourier transform capacitance voltammetry*. *Scientific Reports*, 2023. **13**(1): p. 16739.
3. Gavaghan, D.J., et al., *Analysis of ramped square-wave voltammetry in the frequency domain*. *Journal of Electroanalytical Chemistry*, 2001. **512**(1-2): p. 1-15.
4. Jakubowska, M., *Signal processing in electrochemistry*. *Electroanalysis*, 2011. **23**(3): p. 553-572.
